# Supplementary material
Source: Springer Nature journal article supplement (https://www.springermedizin.de/resource/supplementary/12865_2008_245_MOESM3_ESM.pdf/9427588)

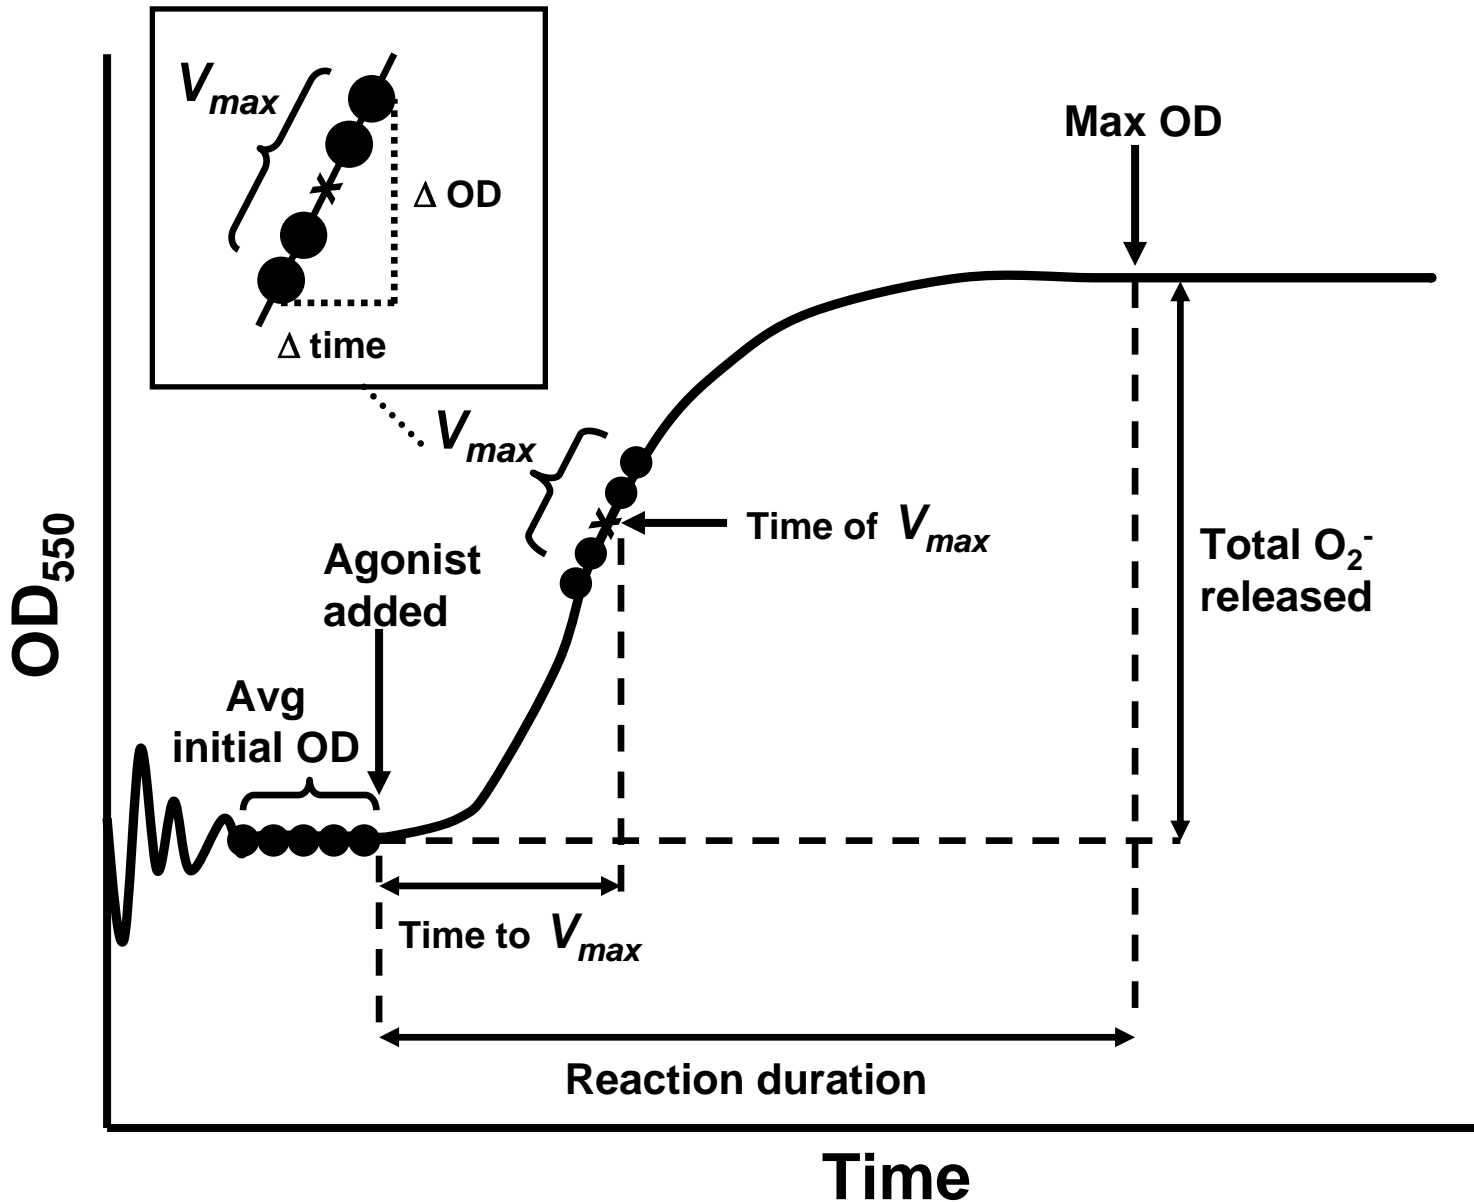

Supplement: MOESM3 [file 9427588]
